# Supplementary material for: Characterization of Possible α-Glucosidase Inhibitors from Trigonella stellata Extract Using LC–MS and In Silico Molecular Docking
Source: MDPI journal article supplement (doi:10.3390/plants11020208), 2022-01-14
Supplement: s1 [file s1]

**Characterization of Possible  $\alpha$ -Glucosidase Inhibitors from *Trigonella stellata*  
Extract Using LC-MS and In-Silico Molecular Docking**

(SUPPLEMENTARY MATERIAL)

Ahlam Elwekeel<sup>1†</sup>, Dalia El Amir<sup>1†</sup>, Enas I. A. Mohamed<sup>1</sup>, Elham Amin<sup>1,2</sup>, Marwa H.  
A. Hassan<sup>1\*</sup> and Mohamed A. Zaki<sup>1\*</sup>

<sup>1</sup>Department of Pharmacognosy, Faculty of Pharmacy, Beni-Suef University, Beni-Suef 62514, Egypt.

<sup>2</sup>Department of Medicinal Chemistry and Pharmacognosy, College of Pharmacy, Qassim University, Buraidah 52571, Saudi Arabia

\*Corresponding authors

<sup>†</sup>Authors with equal contributions

**Figure S1:** 2D diagram of the binding interactions of compounds detected in *Trigonella stellata* to  $\alpha$ -glucosidase enzyme (PDB: 5NN8) binding site.

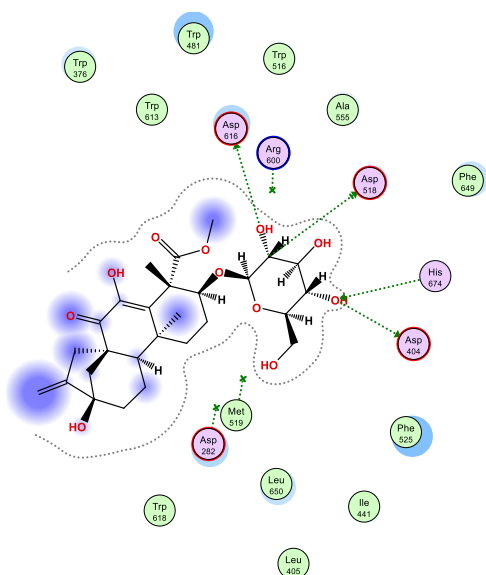

Graecumoside A

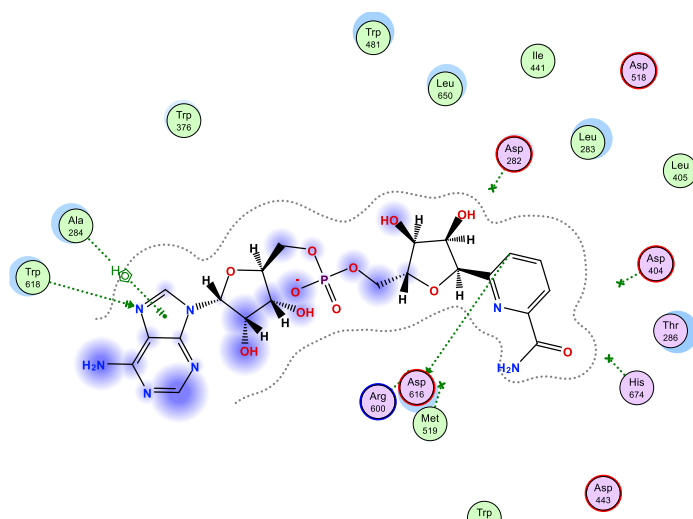

Fenugreekine

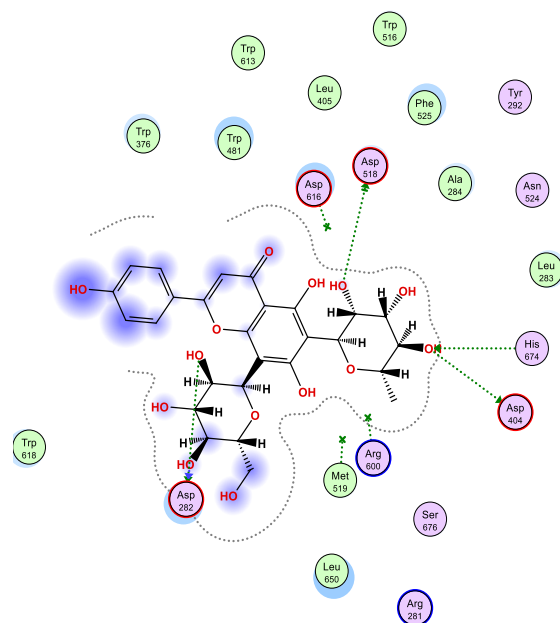

Apigenin-6,8-di-C-rhamnosyl-glucosyl

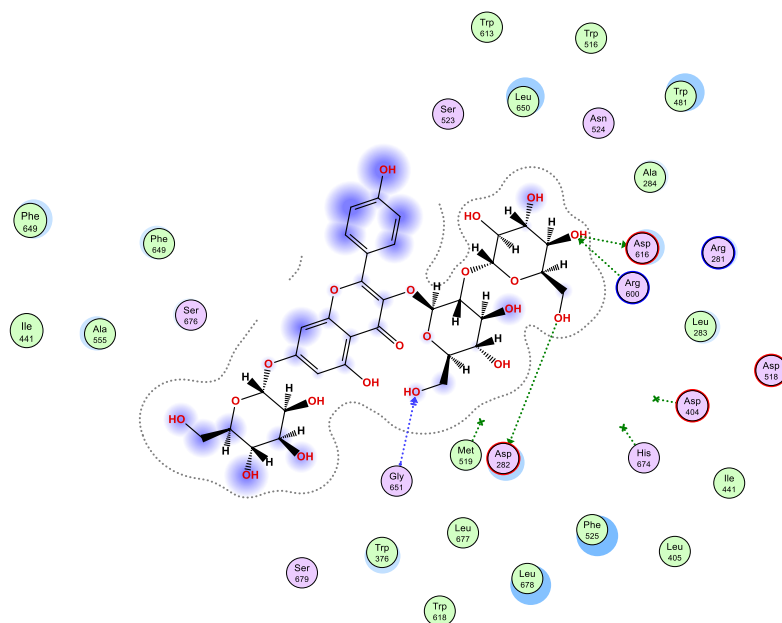

Kaempferol 3-O- $\beta$ -D-glucosyl (1 $\rightarrow$ 2)  $\beta$ -D-galactoside 7-O- $\beta$ -D-glucoside

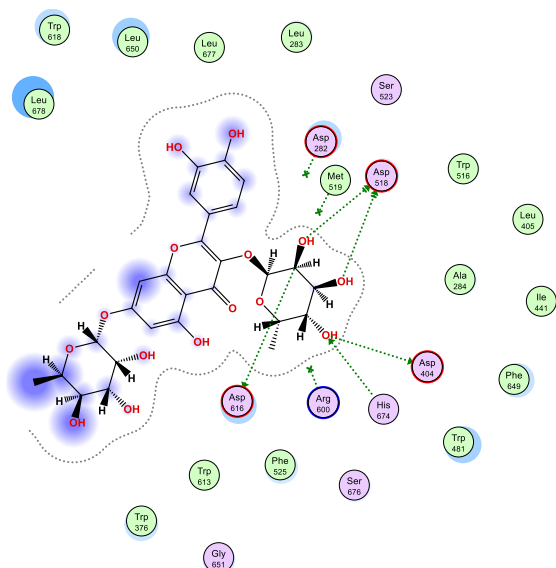

Quercetin-3,7-*O*- $\alpha$ -L dirhamnoside

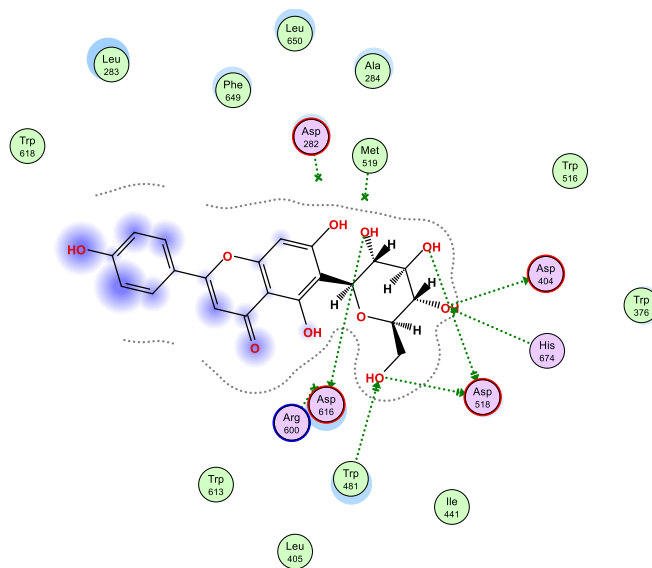

Isovitexin

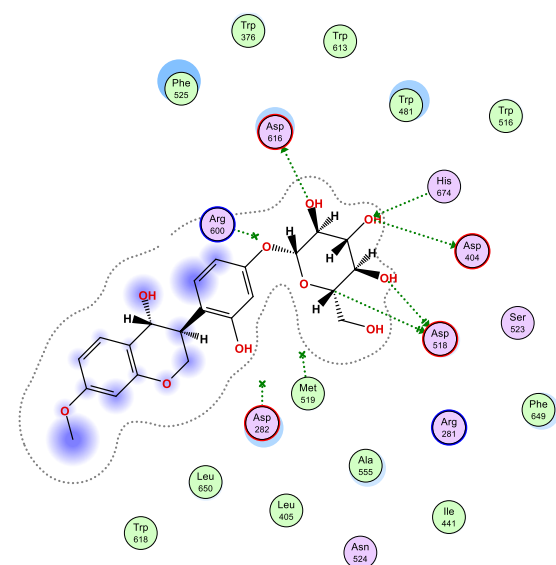

4,2',4'-trihydroxy-7-methoxyisoflavan-4'-*O*- $\beta$ -D-glucopyranoside

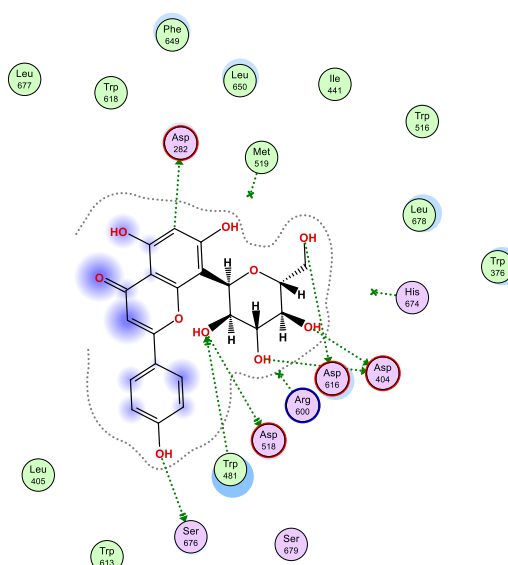

Vitexin

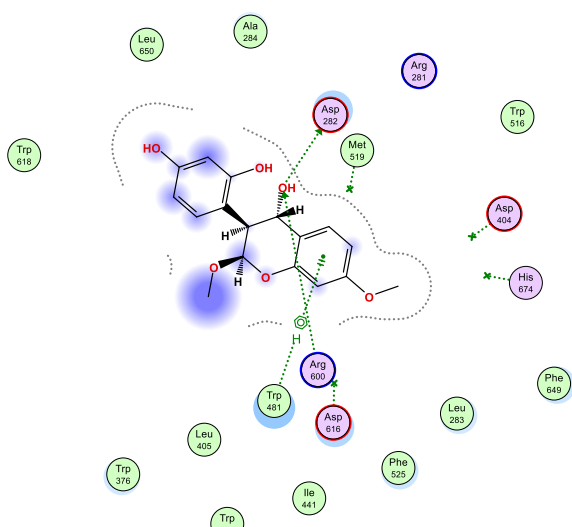

4,2',4'-trihydroxy-2,7dimethoxy isoflavan

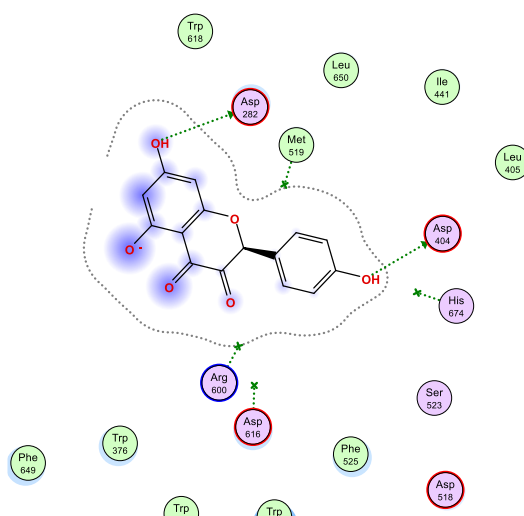

Kaempferol

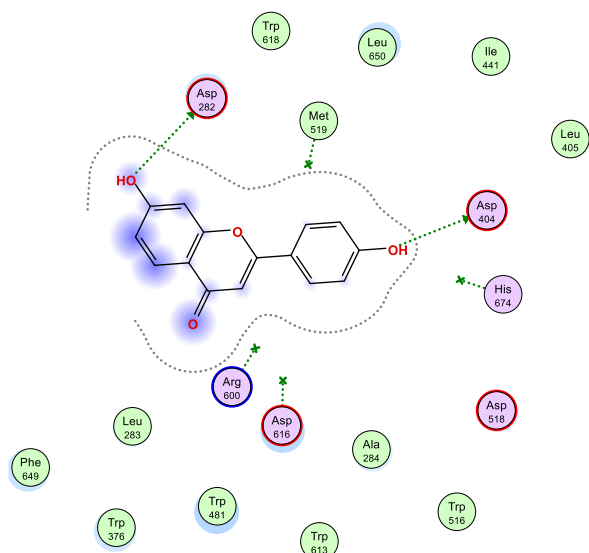

7,4'-dihydroxyflavone

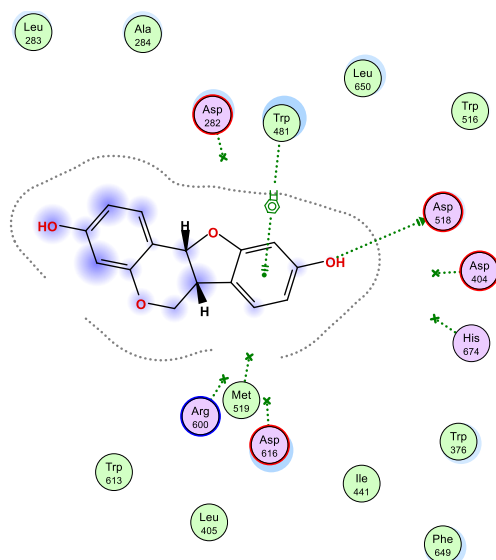

Demethylmedicarpin

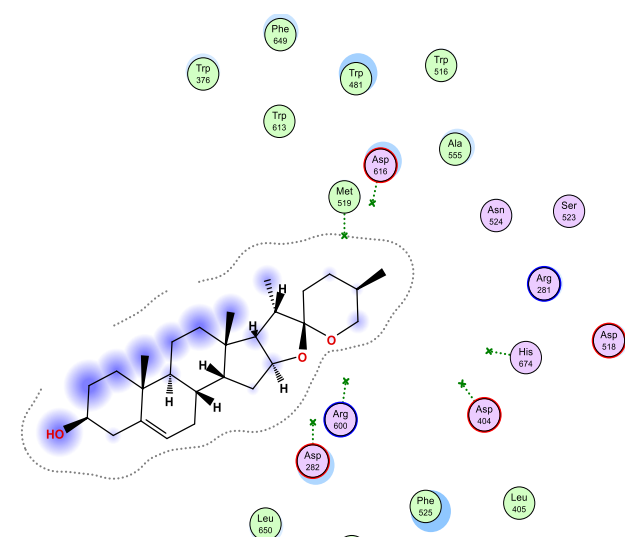

Diosgenin

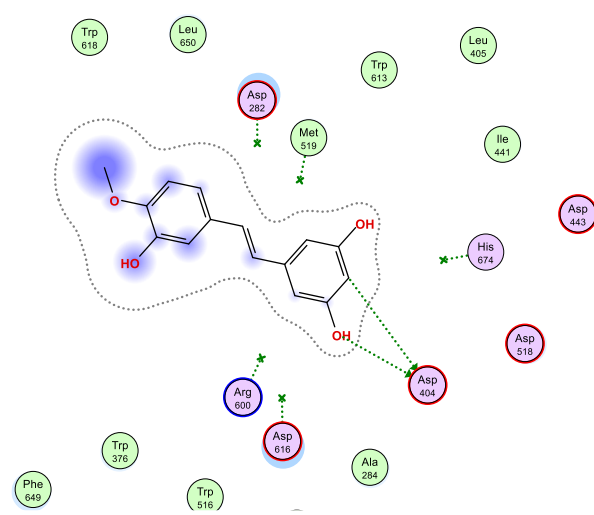

Rhapontigenin

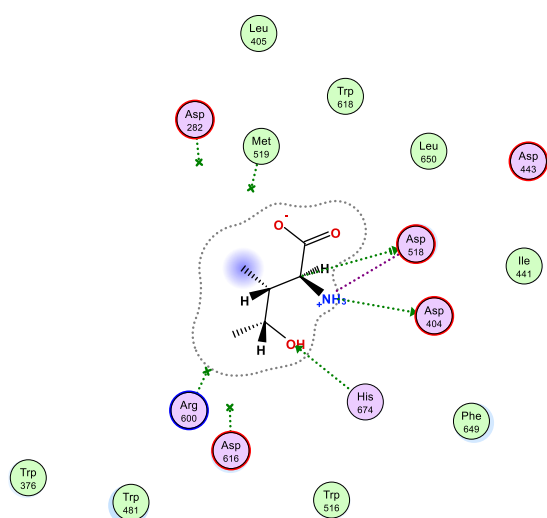

4-Hydroxyisoleucine

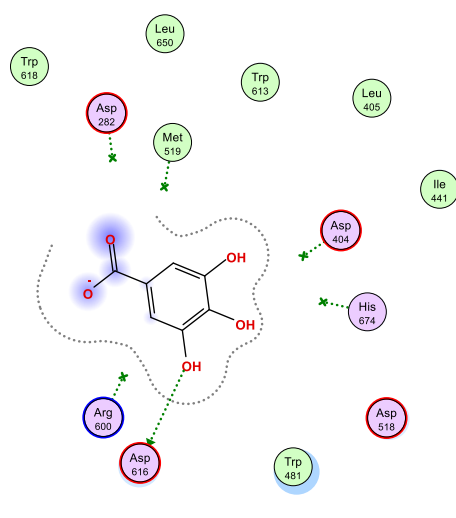

Gallic acid

**Table S1: Molecular docking data of compounds detected in *Trigonella stellata* against  $\alpha$ -glucosidase enzyme (PDB: 5NN8).**

| Compound                                                                                                 | S       | E_place   | E_refine |
|----------------------------------------------------------------------------------------------------------|---------|-----------|----------|
| Quercetin3,7-O- $\alpha$ -L dirhamnoside                                                                 | -8.4145 | -122.8735 | -56.2776 |
| Kaempferol 3-O- $\beta$ -D-glucosyl (1 $\rightarrow$ 2) $\beta$ -D-galactoside 7-O- $\beta$ -D glucoside | -8.2965 | -124.818  | -50.5163 |
| Apigenin-6,8-di-C-rhamnosyl-glucosyl                                                                     | -7.9316 | -70.4017  | -48.7354 |
| 4,2',4'-trihydroxy-7-methoxyisoflavan-4'-O- $\beta$ -D-glucopyranoside                                   | -7.5373 | -79.0674  | -43.2596 |
| Graecumoxide A                                                                                           | -7.5332 | -79.6454  | -44.9570 |
| Fenugreekine                                                                                             | -7.4232 | -67.1776  | -43.5502 |
| Isovitexin                                                                                               | -7.6797 | -81.5558  | -53.8580 |
| Vitexin                                                                                                  | -7.3030 | -76.0586  | -37.0603 |
| Diosgenin                                                                                                | -5.7770 | -50.8094  | -25.5028 |
| 4,2',4'-trihydroxy-2,7dimethoxy isoflavan                                                                | -5.3993 | -56.7509  | -26.3511 |
| Kaempferol                                                                                               | -5.1935 | -49.4873  | -20.8675 |
| 4-Hydroxyisoleucine                                                                                      | -5.1152 | -50.5002  | -22.1747 |
| Rhapontigenin                                                                                            | -5.0388 | -66.4366  | -21.5091 |
| 7,4'-dihydroxyflavone                                                                                    | -4.8529 | -87.7661  | -20.3868 |
| Demethylmedicarpin                                                                                       | -4.8493 | -62.5706  | -22.8222 |
| Gallic acid                                                                                              | -4.2908 | -57.5793  | -14.8477 |
